# Supplementary material for: Data in support of transcriptional regulation and function of Fas-antisense long noncoding RNA during human erythropoiesis
Source: PubMed Central journal article supplement (PMC4838931; doi:10.1016/j.dib.2016.03.106), 2016-04-07
Supplement: mmc1.pdf [file mmc1.pdf]

## ICMJE Form for Disclosure of Potential Conflicts of Interest

### Section 1. Identifying Information

1. Given Name (First Name) Andrew

2. Surname (Last Name) Wilber

3. Date 28-March-2016

4. Are you the corresponding author?  Yes  No

5. Manuscript Title  
Data in support of transcriptional regulation and function of Fas-antisense long noncoding RNA during human erythropoiesis

6. Manuscript Identifying Number (if you know it)  
DIB-D-16-00160

### Section 2. The Work Under Consideration for Publication

Did you or your institution **at any time** receive payment or services from a third party (government, commercial, private foundation, etc.) for any aspect of the submitted work (including but not limited to grants, data monitoring board, study design, manuscript preparation, statistical analysis, etc.)?

Are there any relevant conflicts of interest?  Yes  No

If yes, please fill out the appropriate information below. If you have more than one entity press the "ADD" button to add a row. Excess rows can be removed by pressing the "X" button.

| Name of Institution/Company                          | Grant?                              | Personal Fees?           | Non-Financial Support?   | Other?                   | Comments                                             |
|------------------------------------------------------|-------------------------------------|--------------------------|--------------------------|--------------------------|------------------------------------------------------|
| National Center for Research Resources (S10RR025674) | <input checked="" type="checkbox"/> | <input type="checkbox"/> | <input type="checkbox"/> | <input type="checkbox"/> | National Center for Research Resources (S10RR025674) |
| Doris Duke Charitable Foundation (2010037)           | <input checked="" type="checkbox"/> | <input type="checkbox"/> | <input type="checkbox"/> | <input type="checkbox"/> | Doris Duke Charitable Foundation (2010037)           |

### Section 3. Relevant financial activities outside the submitted work.

Place a check in the appropriate boxes in the table to indicate whether you have financial relationships (regardless of amount of compensation) with entities as described in the instructions. Use one line for each entity; add as many lines as you need by clicking the "Add +" box. You should report relationships that were **present during the 36 months prior to publication**.

Are there any relevant conflicts of interest?  Yes  No

### Section 4. Intellectual Property -- Patents & Copyrights

Do you have any patents, whether planned, pending or issued, broadly relevant to the work?  Yes  No

## ICMJE Form for Disclosure of Potential Conflicts of Interest

---

### Section 5. Relationships not covered above

Are there other relationships or activities that readers could perceive to have influenced, or that give the appearance of potentially influencing, what you wrote in the submitted work?

- Yes, the following relationships/conditions/circumstances are present (explain below):
- No other relationships/conditions/circumstances that present a potential conflict of interest

At the time of manuscript acceptance, journals will ask authors to confirm and, if necessary, update their disclosure statements. On occasion, journals may ask authors to disclose further information about reported relationships.

### Section 6. Disclosure Statement

Based on the above disclosures, this form will automatically generate a disclosure statement, which will appear in the box below.

Dr. Wilber reports grants from National Center for Research Resources (S10RR025674), grants from Doris Duke Charitable Foundation (2010037), during the conduct of the study.

### Evaluation and Feedback

Please visit <http://www.icmje.org/cgi-bin/feedback> to provide feedback on your experience with completing this form.
